# Supplementary material for: Field Baseflow Eluting SOM-Rich Sandy Soil to Exacerbate Non-Point Source Pollution of Lake Erhai, Southwest China
Source: MDPI journal article supplement (doi:10.3390/horticulturae9080898), 2023-08-07
Supplement: s1 [file s1]

Archive with 1 entries (1 files):
- horticulturae-2539748-supplementary.pdf
