# Supplementary material for: Field Baseflow Eluting SOM-Rich Sandy Soil to Exacerbate Non-Point Source Pollution of Lake Erhai, Southwest China
Source: MDPI journal article supplement (doi:10.3390/horticulturae9080898), 2023-08-07
Supplement: s1 [file s1 › horticulturae-2539748-supplementary.pdf]

**Field Baseflow Eluting SOM-rich Sandy Soil to Exacerbate Non-point Source  
Pollution of Lake Erhai, Southwest China**

*Debo He<sup>a, b, c</sup>, Xianglong Liu<sup>a, b, c</sup>, Yan Fu<sup>a, b, c</sup>, Tao Wang<sup>a, b</sup> and Bo Zhu<sup>a, b \*</sup>*

*<sup>a</sup> Institute of Mountain Hazards and Environment, Chinese Academy of Sciences,  
Chengdu, 610041, China*

*<sup>b</sup> Key Laboratory of Mountain Surface Process and Ecological Regulation, Chinese  
Academy of Sciences, Chengdu, 610041, China*

*<sup>c</sup> University of Chinese Academy of Sciences, Beijing, 100049, China*

**\*Corresponding Author**

*Bo Zhu*

E-mail: bzhu\_imde@163.com

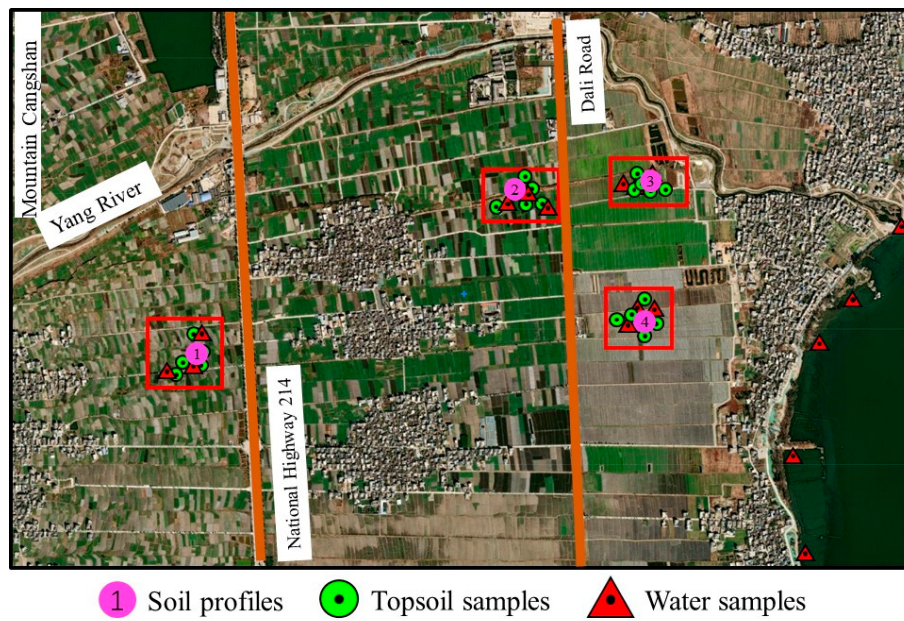

Figure S1. Distributions of sample sites in the Lake Erhai basin.

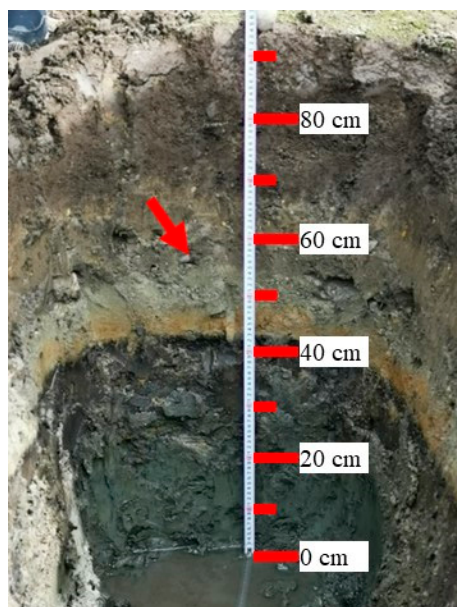

Figure S2. One of soil profiles of agricultural planting area in west bank of Lake Erhai.

The red arrow marks the gravel layer blow about 50 cm blow of topsoil.

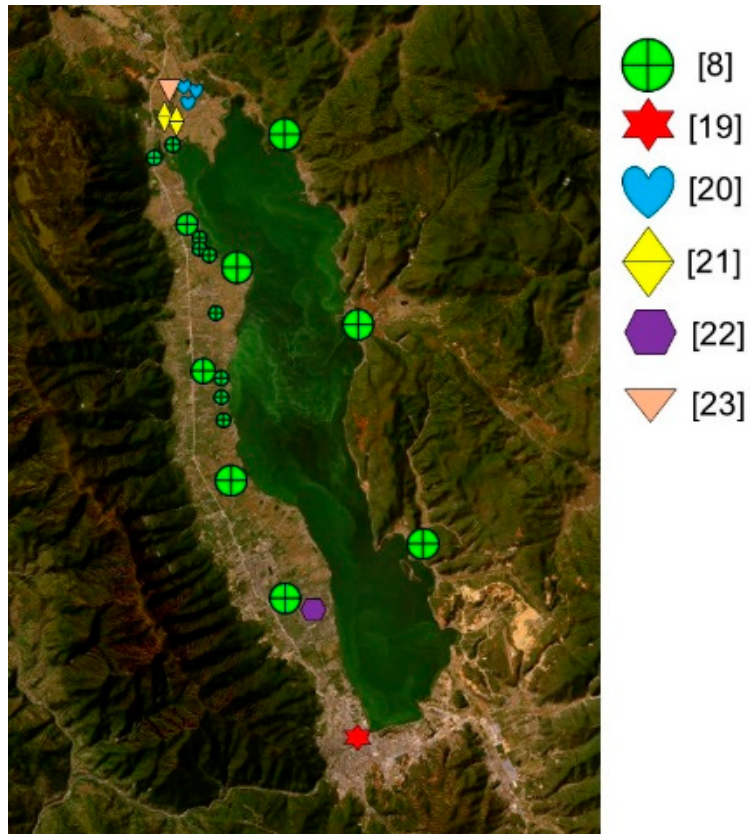

Figure S3. Locations of soil sample sites in literature surveys.

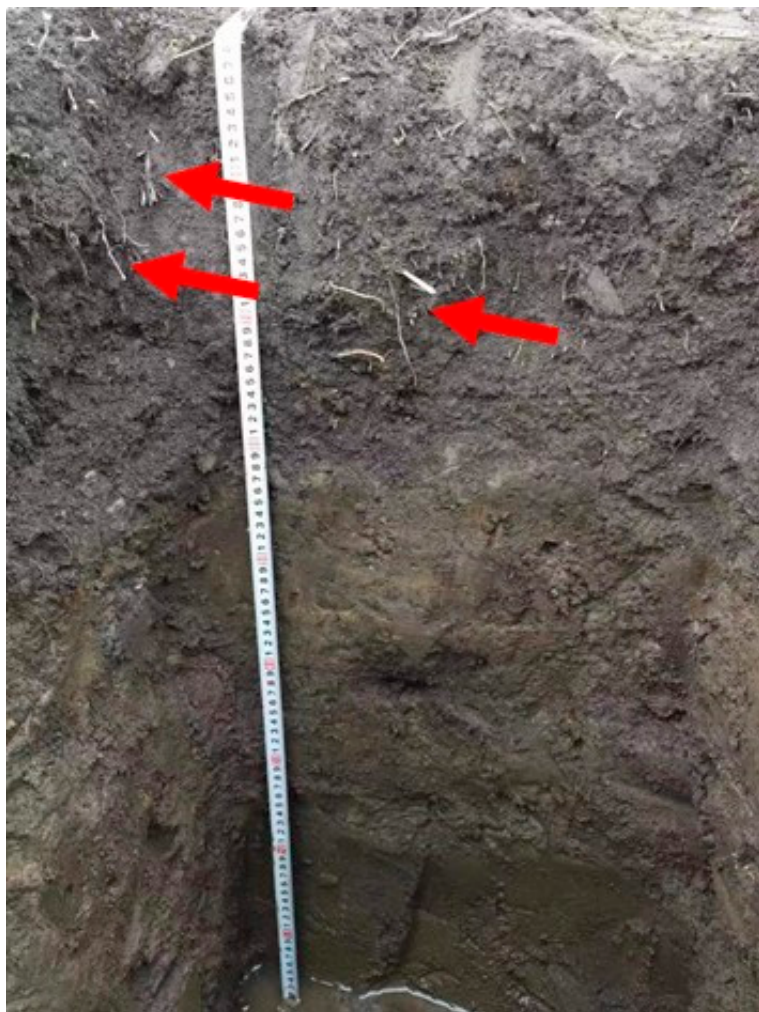

Figure S4. One of soil profiles of agricultural planting area in west bank of Lake Erhai.

The red arrows mark the straw residues in the topsoil.

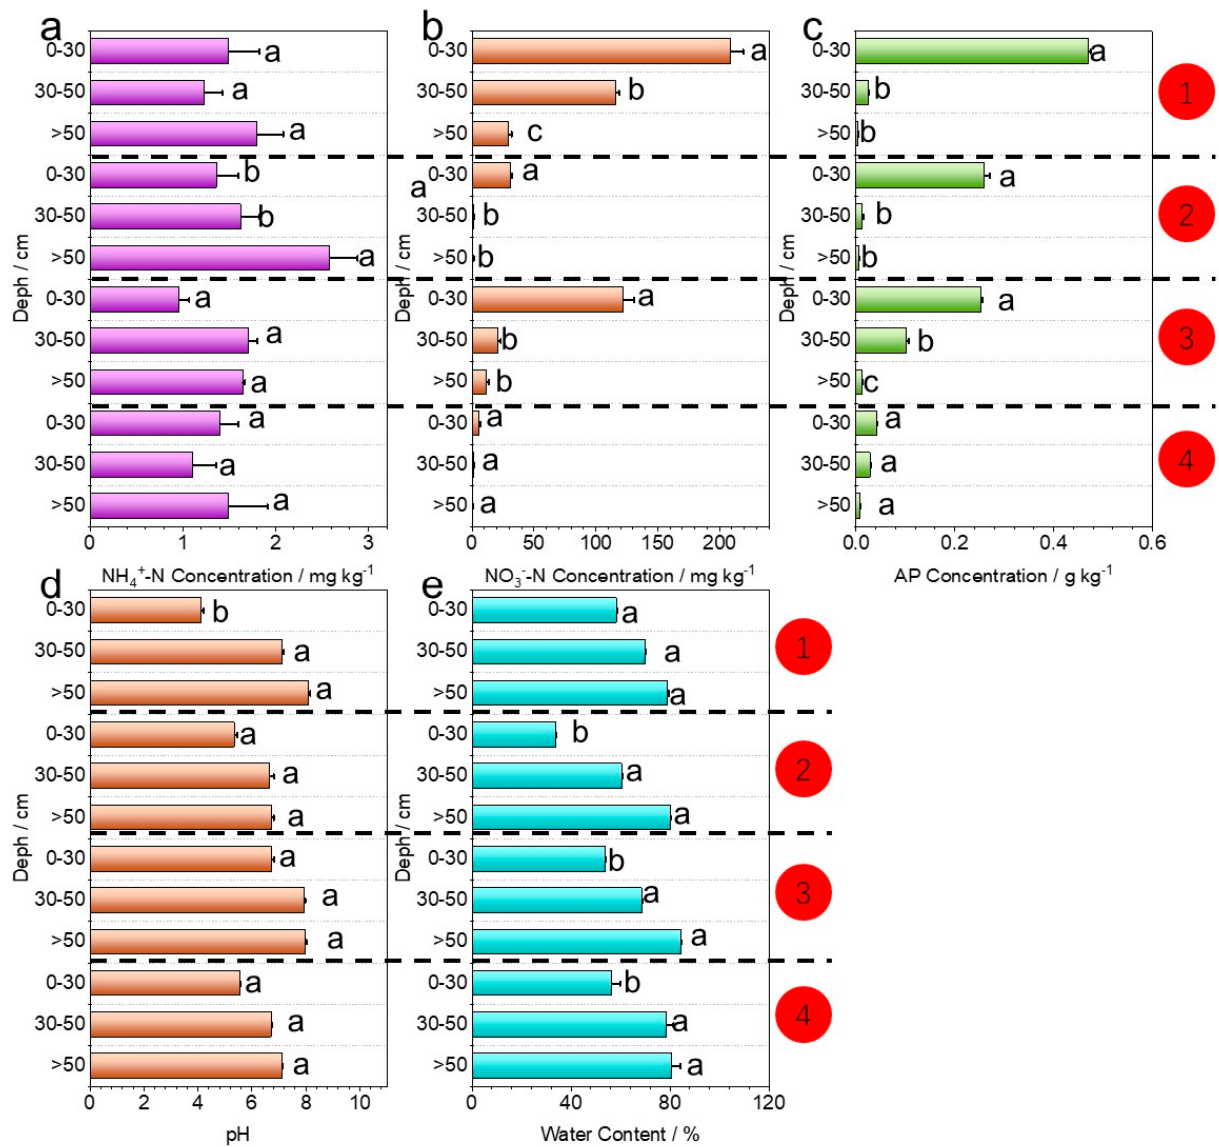

Figure S5. Nutrient concentrations of (a)  $\text{NH}_4^+\text{-N}$ , (b)  $\text{NO}_3^-\text{-N}$  and (c) AP in different soil depth. (d) Soil pH and (e) water content in different soil depth. The serial numbers of soil profiles from 1–4 are distributed from mountain Cangshan to Lake Erhai, with crops of corn, vegetable, tobacco and rice, respectively.

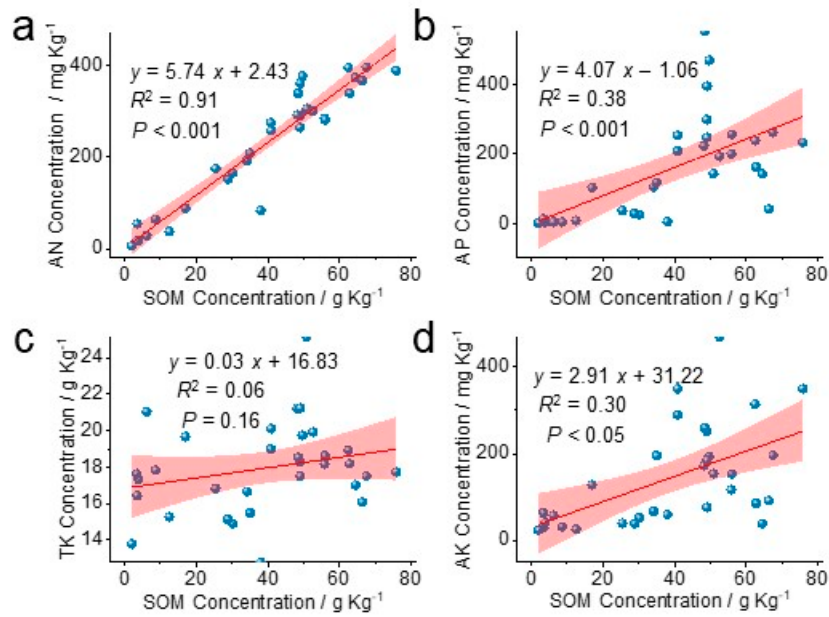

Figure S6. Correlation between SOM concentration with soil nutrient concentrations of (a) AN, (b) AP, (c) TK and (d) AK. The red lines represent fitting line. The pink areas indicate 95% Confidence Band. Significant difference was marked by “ $P < 0.05$ ” and “ $P < 0.001$ ”.

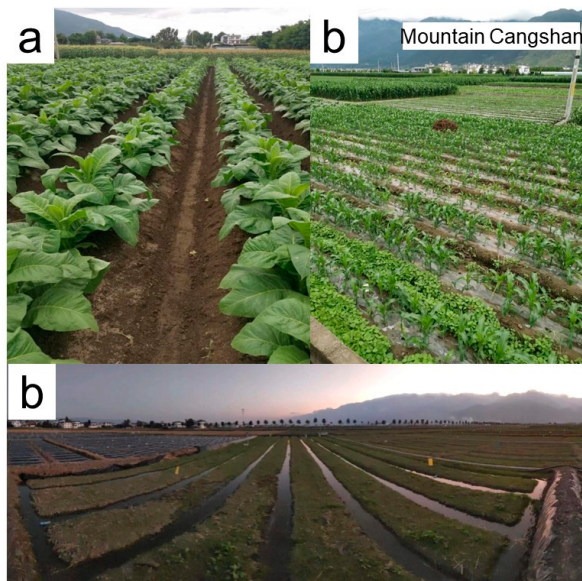

Figure S7. Pictures of the ridge cultivations in (a) tobacco and (b) corn fields and (c) flood irrigation in field.

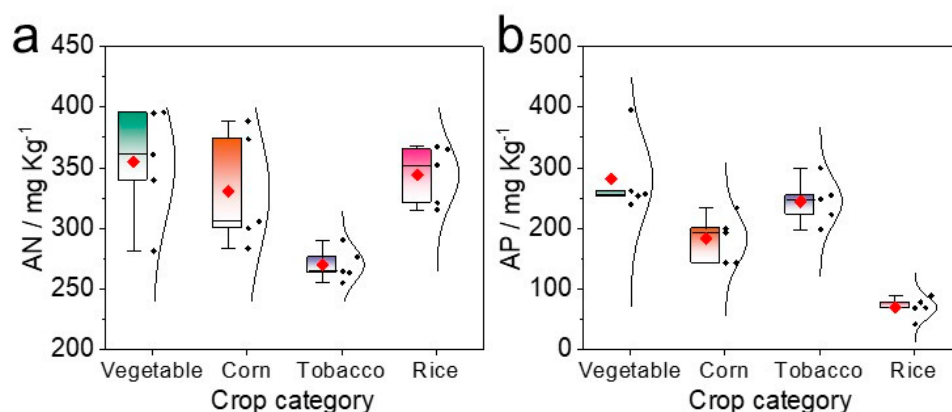

Figure S8. Concentrations of (a) AN and (b) AP in topsoil (0-20 cm) from different crops fields. The red diamond indicates mean values. The solid line represents the median. The up and down boundaries of box means the percentage lines of 75% and 25%, respectively. The right arc represents the distribution of concentrations.

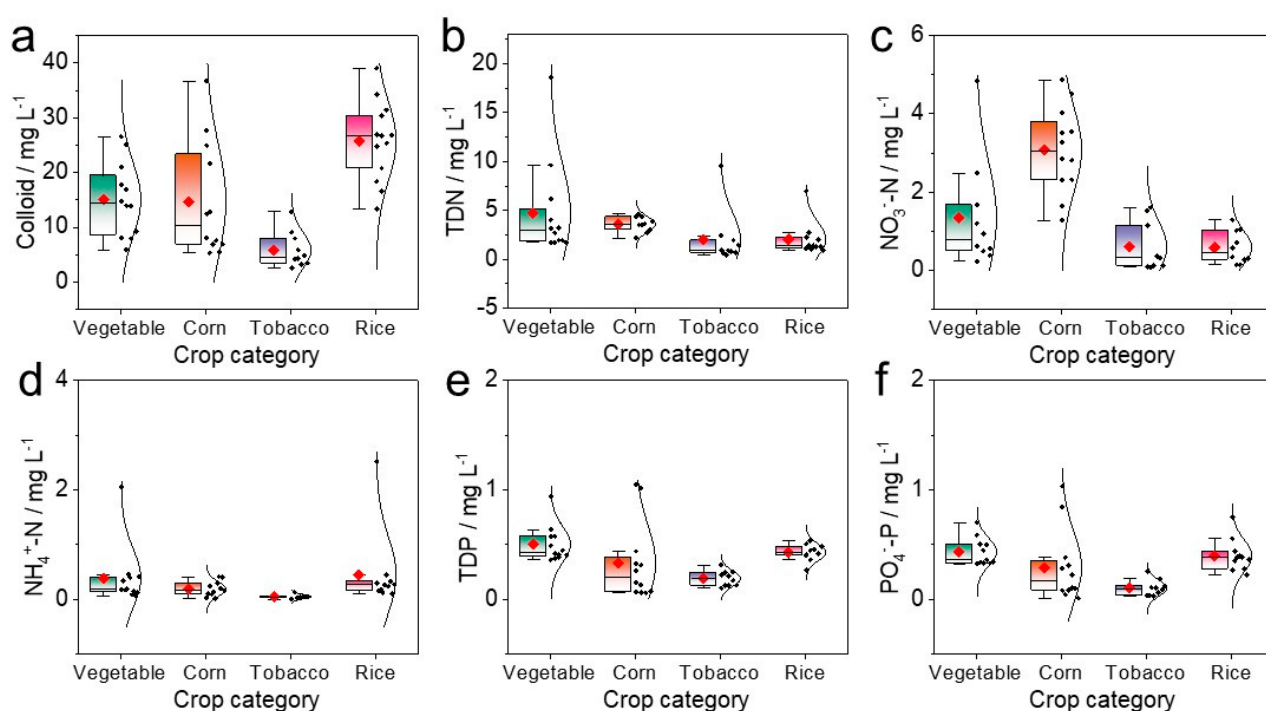

Figure S9. Concentrations of (a) colloid, (a) TDN, (c)  $\text{NO}_3^-$ -N, (d)  $\text{NH}_4^+$ -N, (e) TDP and (f)  $\text{PO}_4^{3-}$ -P in field baseflow. The red diamond indicates mean values. The solid line represents the median. The up and down boundaries of box means the percentage lines of 75% and 25%, respectively. The right arc represents the distribution of

concentrations.

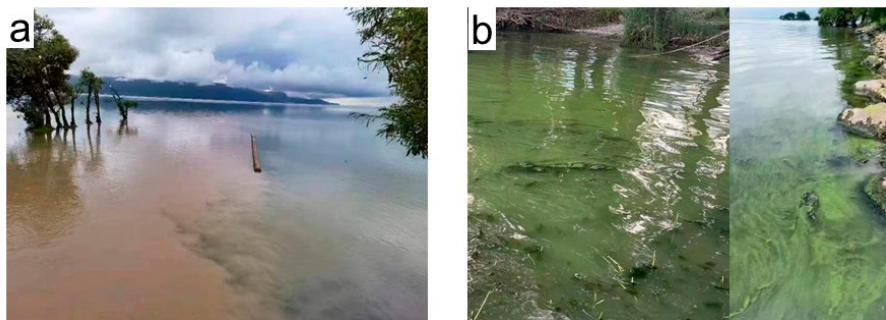

Figure S10. Photos of (a) confluence of Lake Erhai during rainfall on 07/01/2022 and (b) blooms in Lake Erhai after rainfall on 07/03/2022.

Table S1. Water quality grading in Yunnan province, China.

| Category / mg L <sup>-1</sup> | Class I | Class II | Class III | Class IV | Class V |
|-------------------------------|---------|----------|-----------|----------|---------|
| TP≤                           | 0.02    | 0.1      | 0.2       | 0.3      | 0.4     |
| TN≤                           | 0.2     | 0.5      | 1.0       | 1.5      | 2.0     |

Table S2. Percentages of soil particle size at different depths. Land numbers of soil profiles from

1–4 indicate corn, vegetable, tobacco and rice, respectively.

|                       | Land<br>numbering | 1 / % |       |      | 2 / % |       |      | 3 / % |       |      | 4 / % |       |      |
|-----------------------|-------------------|-------|-------|------|-------|-------|------|-------|-------|------|-------|-------|------|
|                       |                   | 0-30  | 30-50 | >50  | 0-30  | 30-50 | >50  | 0-30  | 30-50 | >50  | 0-30  | 30-50 | >50  |
| Particle size<br>(mm) | >1                | 1.3   | 0.9   | 0.6  | 2.5   | 2.4   | 0    | 1.7   | 3     | 0    | 2     | 2.3   | 1.4  |
|                       | 1-0.5             | 2     | 2.8   | 1.2  | 3.9   | 4.6   | 0.2  | 3     | 6.2   | 0    | 2.6   | 3.3   | 1.6  |
|                       | 0.5-0.25          | 11    | 16.8  | 4.8  | 11.8  | 14.4  | 8.8  | 11.5  | 18.8  | 1.6  | 7.4   | 7.8   | 7.5  |
|                       | 0.25-0.05         | 22.6  | 33.9  | 27.7 | 28.2  | 26.6  | 42.2 | 22.9  | 23.4  | 32   | 19.8  | 25.9  | 33   |
|                       | 0.05-0.02         | 19.3  | 18.7  | 28   | 19.9  | 20.1  | 19.9 | 18.6  | 15.8  | 31.9 | 18.2  | 20.7  | 20.7 |
|                       | 0.02-0.002        | 29.6  | 16.3  | 27.2 | 22.3  | 21.6  | 19   | 28.1  | 19.4  | 24.7 | 29.6  | 23.4  | 21.1 |
|                       | <0.002            | 14.3  | 10.6  | 10.6 | 11.3  | 10.4  | 9.9  | 14.2  | 13.4  | 9.8  | 20.5  | 16.6  | 14.7 |

Table S3. The information of fertilizers.

| Categories of fertilizer            | Nutrients ratio / % |     |    |                |
|-------------------------------------|---------------------|-----|----|----------------|
|                                     | N                   | p   | K  | Organic matter |
| Compound fertilizer                 | 15                  | 15  | 15 | --             |
| urea                                | ≥46                 | --  | -- | --             |
| Organic fertilizer (chicken manure) |                     | ≥ 7 |    | ≥50            |
| Organic fertilizer (sheep manure)   |                     | ≥ 8 |    | ≥ 45           |
| microbial fertilizer                |                     | ≥22 |    | ≥ 45           |
